# Supplementary material for: K.Vita: a feasibility study of a blend of medium chain triglycerides to manage drug-resistant epilepsy
Source: Oxford University Press journal article supplement (doi:10.1093/braincomms/fcab160), 2021-07-15
Supplement: fcab160_supplementary_data.pdf [file fcab160_supplementary_data.pdf]

**Supplementary Table 1: Sensitivity analyses to assess the impact of changing dose or number of anti-seizure drugs during the intervention period, and to account for changes to the study protocol, on number of reported seizures or paroxysmal events at visits A, B and C**

|             | Final Model      |        | Sensitivity Analysis 1 |        | Sensitivity Analysis 2 |        | Sensitivity Analysis 3 |        |
|-------------|------------------|--------|------------------------|--------|------------------------|--------|------------------------|--------|
|             | est (se)         | Pval   | est (se)               | Pval   | est (se)               | Pval   | est (se)               | Pval   |
| (Intercept) | 2.66 (0.266)     | <0.001 | 2.72 (0.272)           | <0.001 | 2.88 (0.305)           | <0.001 | 1.97 (0.553)           | <0.001 |
| sourceDum   | -0.61<br>(0.524) | 0.121  | -0.49<br>(0.531)       | 0.179  | -1.11<br>(0.594)       | 0.031  | 1.06 (0.993)           | 0.143  |
| childDum    | -0.34<br>(0.523) | 0.261  | -0.35<br>(0.531)       | 0.254  | -0.52<br>(0.595)       | 0.193  | -0.74<br>(1.101)       | 0.251  |
| visitB      | -0.45<br>(0.132) | <0.001 | -0.46<br>(0.136)       | <0.001 | -0.46<br>(0.148)       | 0.001  | -0.42<br>(0.315)       | 0.089  |
| visitC      | -0.68<br>(0.134) | <0.001 | -0.7 (0.139)           | <0.001 | -0.68<br>(0.155)       | <0.001 | -0.68 (0.28)           | 0.008  |

Sensitivity analysis 1: Excluding patients with any change in dose or number of anti-seizure drugs taken during the intervention period

Sensitivity analysis 2: Only including participants who entered the study prior to the protocol amendment (implemented 1st June 2017)

Sensitivity analysis 2: Only including participants who entered the study after the protocol amendment (implemented 1st June 2017)

**Supplementary Information: K.Vita® Study Group**

Dr Sanjeev Rajakulendran, National Hospital for Neurology and Neurosurgery, London

Dr Aikaterini Vezyroglou, Great Ormond Street Hospital for Children, London

Dr Suresh Pujar, Great Ormond Street Hospital for Children, London

Dr Judith Kalsner, Great Ormond Street Hospital for Children, London

Dr Christin Eltze, Great Ormond Street Hospital for Children, London

Dr Sophia Varadkar, Great Ormond Street Hospital for Children, London

Dr Robert Robinson, Great Ormond Street Hospital for Children, London

Professor Shamima Rahman, Great Ormond Street Hospital for Children, London
